# Supplementary material for: Influence of Mask Wearing during COVID-19 Surge and Non-Surge Time Periods in Two K-12 Public School Districts in Georgia, USA
Source: MDPI journal article supplement (doi:10.3390/ijerph20095715), 2023-05-04
Supplement: s1 [file s1]

## Supplementary Material

**Table S1.** COVID-19 Rate Ratio Surge Period (August 2021) to Non-Surge Period (October 2021) for School Districts by School Level.

| School District                                  | School Level      | Rate Ratio | 95% Confidence      | p-value |
|--------------------------------------------------|-------------------|------------|---------------------|---------|
|                                                  |                   |            | Interval (LL, UL) * |         |
| Mask Optional<br>(Cobb County School District)   | Elementary School | 2.89       | (2.52, 3.29)        | <0.001  |
|                                                  | Middle School     | 3.55       | (2.80, 4.54)        | <0.001  |
|                                                  | High School       | 3.35       | (2.86, 3.94)        | <0.001  |
| Mask Required<br>(DeKalb County School District) | Elementary School | 2.03       | (1.77, 2.33)        | <0.001  |
|                                                  | Middle School     | 2.17       | (1.70, 2.77)        | <0.001  |
|                                                  | High School       | 2.25       | (1.91, 2.67)        | <0.001  |

\* LL = lower limit, UL = upper limit.

**Table S2.** Community Transmission Rates During August 2021 and October 2021.

|                         | Mask Required<br>DeKalb County<br>(Number of cases per 100,000) | Mask Required<br>DeKalb County<br>(Number of cases per 100,000) |
|-------------------------|-----------------------------------------------------------------|-----------------------------------------------------------------|
| 8/7/2021 - 8/13/2021    | 403                                                             | 414                                                             |
| 8/14/2021 - 8/27/2021   | 604                                                             | 505                                                             |
| 10/2/2021 - 10/15/2021  | 224                                                             | 287                                                             |
| 10/16/2021 - 10/29/2021 | 138                                                             | 115                                                             |

Source: Georgia Department of Public Health County Indicator Reports (accessed 4/12/2023) [34].
